# Supplementary material for: Authigenic rhabdophane from brown iron ore of the oxidation zone of the Babaryk massive sulfide occurrence (South Urals): scanning electron microscope (SEM) and electron backscattered diffraction (EBSD) study
Source: Copernicus journal article supplement (doi:10.5194/ejm-33-605-2021), 2021-10-06
Supplement: Supplementary file 1 [file ejm-33-605-2021-supplement.zip]

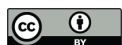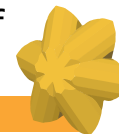

*Supplement of*

**Authigenic rhabdophane from brown iron ore of the oxidation zone of the Babaryk massive sulfide occurrence (South Urals): scanning electron microscope (SEM) and electron backscattered diffraction (EBSD) study**

**Elena V. Belogub et al.**

*Correspondence to:* Elena V. Belogub (belogub\_e@yahoo.com)

- [ejm-33-605-2021-supplement-title-page.pdf](#)
- [Supplement S1.jpg](#)
- [Supplement S2.docx](#)

The copyright of individual parts of the supplement might differ from the article licence.
