# Supplementary material for: Authigenic rhabdophane from brown iron ore of the oxidation zone of the Babaryk massive sulfide occurrence (South Urals): scanning electron microscope (SEM) and electron backscattered diffraction (EBSD) study
Source: Copernicus journal article supplement (doi:10.5194/ejm-33-605-2021), 2021-10-06
Supplement: Supplementary file 1 [file Supplement S2.docx]

Supplementary B. Chemical composition of rhabdophane (wt.%)

| Element/  No | O | P | S | Ca | Fe | Sr | Y | La | Ce | Pr | Nd | Sm | Gd | Dy | Er | Yb | Сумма | Ca+Sr | REE +Y | REE |
| --- | --- | --- | --- | --- | --- | --- | --- | --- | --- | --- | --- | --- | --- | --- | --- | --- | --- | --- | --- | --- |
|  | 25,86 | 10,42 | 1,51 | 3,35 | 2,25 |  | 1,72 | 8,34 | 22,44 | 2,05 | 8,23 | 1,27 | 0,96 | 0,37 | 0 | - | 88,92 | 3,35 | 45,38 | 43,66 |
|  | 27,40 | 9,80 | 3,31 | 3,95 | 1,39 | 0,77 | 4,16 | 7,48 | 19,53 | 1,68 | 7,49 | 1,51 | 1,42 | 0,75 | 0,44 | - | 91,42 | 4,72 | 44,46 | 40,30 |
|  | 25,84 | 10,31 | 1,54 | 1,93 | 2,65 | - | 5,09 | 4,73 | 20,64 | 1,97 | 7,80 | 1,94 | 1,46 | 1,27 | 0,27 | - | 87,87 | 1,93 | 45,17 | 40,08 |
|  | 28,25 | 12,02 | 0,80 | 1,22 | 1,87 | - | 8,12 | 5,95 | 17,87 | 1,74 | 7,60 | 1,78 | 1,83 | 1,15 | - | - | 90,73 | 1,22 | 46,04 | 37,92 |
|  | 26,81 | 9,53 | 3,60 | 4,14 | 1,67 | 0,50 | 3,17 | 7,51 | 19,43 | 1,33 | 7,47 | 1,47 | 1,06 | 0,74 | - | - | 88,61 | 4,64 | 42,18 | 39,01 |
|  | 26,69 | 11,67 | 0,84 | 1,60 | 1,25 | - | 7,76 | 5,68 | 17,77 | 1,63 | 7,81 | 2,01 | 2,14 | 1,40 | - | - | 88,61 | 1,60 | 46,20 | 38,44 |
|  | 27,15 | 10,80 | 1,22 | 1,69 | 1,99 | - | 5,31 | 4,87 | 20,96 | 1,67 | 7,74 | 1,69 | 1,59 | 1,32 | - | - | 89,82 | 1,69 | 45,15 | 39,84 |
|  | 26,51 | 10,74 | 0,65 | 1,52 | 1,75 | - | 7,31 | 5,92 | 17,65 | 1,44 | 7,80 | 1,61 | 1,88 | 1,05 | - | - | 89,33 | 1,52 | 44,66 | 37,35 |
|  | 26,91 | 9,63 | 3,67 | 4,09 | 1,21 | 0,82 | 3,33 | 7,43 | 20,19 | 1,52 | 7,56 | 1,64 | 0,91 | - | - | - | 89,02 | 4,91 | 42,58 | 39,25 |
|  | 25,87 | 10,87 | 1,49 | 1,85 | 1,70 | - | 5,37 | 4,66 | 20,82 | 1,81 | 8,15 | 2,23 | 1,87 | 1,49 | - | - | 88,19 | 1,85 | 46,4 | 41,03 |
|  | 25,96 | 10,64 | 1,51 | 3,31 | 1,15 | 0,73 | 2,40 | 8,59 | 22,87 | 1,85 | 8,60 | 1,03 | 0,66 | - | - | - | 89,43 | 4,04 | 46,00 | 43,60 |
|  | 26,99 | 11,56 | 0,54 | 1,38 | 2,27 | - | 8,25 | 6,36 | 17,82 | 1,80 | 8,00 | 1,88 | 1,61 | 1,52 | - | - | 89,97 | 1,38 | 47,24 | 38,99 |
|  | 28,70 | 8,04 | 5,10 | 5,41 | 4,82 | 0,72 | 1,73 | 4,30 | 18,24 | 1,83 | 7,67 | 1,35 | 0,83 | 0,35 | - | - | 89,22 | 6,13 | 36,3 | 34,57 |
|  | 27,13 | 9,83 | 3,56 | 3,70 | 2,17 | 0,86 | 3,22 | 4,24 | 21,16 | 2,10 | 8,78 | 1,96 | 1,28 | 0,81 | - | - | 90,96 | 4,56 | 43,55 | 40,33 |
|  | 27,04 | 10,02 | 2,57 | 3,44 | 1,82 | 0,38 | 3,87 | 5,66 | 19,12 | 1,65 | 8,45 | 1,86 | 1,22 | - | - | - | 87,10 | 3,82 | 41,83 | 37,96 |
|  | 24,33 | 9,96 | 2,53 | 3,26 | 1,88 | 0,42 | 4,54 | 5,2 | 19,58 | 1,66 | 8,52 | 1,46 | 1,38 | - | - | - | 84,71 | 3,68 | 42,34 | 37,80 |
|  | 25,03 | 10,03 | 1,93 | 2,95 | 2,04 | 0,34 | 3,76 | 5,11 | 18,76 | 1,99 | 8,26 | 1,90 | 1,82 | 1,01 | - | - | 84,93 | 3,29 | 42,61 | 38,85 |
|  | 26,71 | 9,85 | 2,97 | 3,23 | 2,17 | 0,44 | 3,80 | 4,29 | 20,32 | 1,53 | 8,08 | 1,74 | 1,71 | 0,79 | - | - | 87,64 | 3,67 | 42,26 | 38,46 |
|  | 26,33 | 10,64 | 1,61 | 1,99 | 1,66 | - | 4,14 | 4,05 | 22,48 | 1,49 | 8,00 | 1,86 | 1,46 | - | - | - | 85,72 | 1,99 | 43,48 | 39,34 |
|  | 25,62 | 10,80 | 1,48 | 2,01 | 1,82 | - | 5,28 | 4,79 | 21,65 | 1,61 | 8,14 | 1,94 | 1,91 | 1,19 | - | - | 88,23 | 2,01 | 46,51 | 41,23 |
|  | 25,81 | 11,92 | 0,39 | 1,27 | 1,78 | - | 5,64 | 4,96 | 22,56 | 1,66 | 7,20 | 1,79 | 1,55 | 1,49 | - | - | 88,25 | 1,27 | 46,85 | 41,21 |
|  | 26,70 | 10,9 | 2,03 | 3,00 | 1,89 | - | 4,67 | 5,61 | 20,51 | 1,35 | 7,21 | 1,75 | 1,70 | 1,21 | - | - | 88,55 | 3,00 | 44,01 | 39,34 |
|  | 26,5 | 11,95 | 0,19 | 0,92 | 1,87 | - | 6,60 | 4,70 | 21,75 | 1,53 | 7,33 | 1,61 | 1,52 | 1,31 | - | - | 87,77 | 0,92 | 46,35 | 39,75 |
|  | 26,98 | 11,99 | 0,19 | 0,88 | 1,81 | - | 7,11 | 4,68 | 21,17 | 1,77 | 7,22 | 1,72 | 1,89 | 1,50 | - | - | 89,18 | 0,88 | 47,06 | 39,95 |
|  | 27,07 | 10,08 | 3,15 | 4,10 | 1,78 | 0,37 | 3,52 | 5,62 | 20,24 | 1,22 | 7,49 | 1,32 | 1,06 | - | - | - | 87,03 | 4,47 | 40,47 | 36,95 |
|  | 25,33 | 9,72 | 3,65 | 4,51 | 1,57 | 0,47 | 3,85 | 6,21 | 18,75 | 1,22 | 7,55 | 1,97 | 1,57 | 1,16 | - | - | 87,52 | 4,98 | 42,28 | 38,43 |
|  | 26,07 | 10,65 | 2,30 | 3,34 | 1,65 | 0,48 | 4,50 | 5,62 | 20,89 | 1,82 | 7,67 | 1,85 | 1,59 | 1,10 | - | - | 89,52 | 3,82 | 45,04 | 40,54 |
|  | 27,53 | 9,33 | 3,91 | 4,39 | 1,82 | 0,45 | 3,47 | 6,29 | 19,83 | 1,29 | 7,20 | 1,02 | 0,89 | - | - | - | 87,42 | 4,84 | 39,99 | 36,52 |
|  | 27,03 | 9,35 | 3,31 | 4,00 | 2,36 | 0,50 | 4,43 | 6,09 | 18,31 | 1,24 | 6,76 | 1,05 | 0,94 | - | - | - | 85,38 | 4,50 | 38,82 | 34,39 |
|  | 27,14 | 11,82 | 0,68 | 1,62 | 1,75 | - | 8,95 | 5,74 | 17,63 | 1,24 | 6,50 | 1,58 | 1,98 | 1,31 | - | - | 87,96 | 1,62 | 44,93 | 35,98 |
|  | 27,78 | 12,39 | 0,20 | 1,03 | 1,74 | - | 8,79 | 5,30 | 19,90 | 1,42 | 6,90 | 1,73 | 2,22 | 1,70 | 0,67 | - | 91,77 | 1,03 | 48,63 | 39,84 |
