# Supplementary material for: Authigenic rhabdophane from brown iron ore of the oxidation zone of the Babaryk massive sulfide occurrence (South Urals): scanning electron microscope (SEM) and electron backscattered diffraction (EBSD) study
Source: Copernicus journal article supplement (doi:10.5194/ejm-33-605-2021), 2021-10-06
Supplement: Supplementary file 2 [file ejm-33-605-2021-supplement.zip]

Archive with 3 entries (3 files):
- Supplement S1.jpg
- Supplement S2.docx
- ejm-33-605-2021-supplement-title-page.pdf
