# Supplementary figures and images for: Authigenic rhabdophane from brown iron ore of the oxidation zone of the Babaryk massive sulfide occurrence (South Urals): scanning electron microscope (SEM) and electron backscattered diffraction (EBSD) study
Source: Copernicus journal article supplement (doi:10.5194/ejm-33-605-2021), 2021-10-06

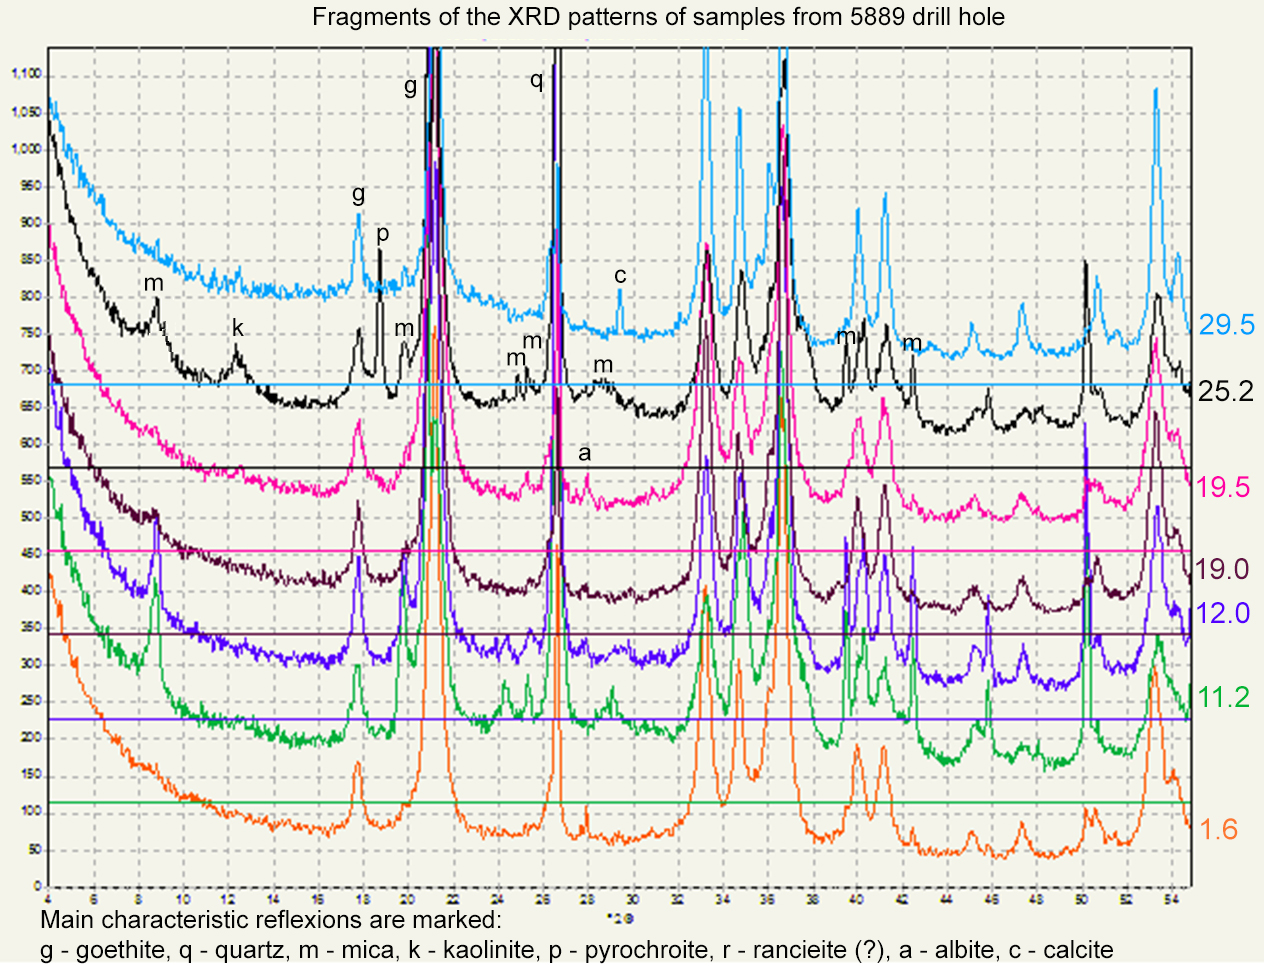

Supplement: Supplementary file 2 [file ejm-33-605-2021-supplement.zip › Supplement S1.jpg]
